# Supplementary material
Source: Springer Nature journal article supplement (https://www.springermedizin.de/resource/supplementary/12879_2010_1239_MOESM1_ESM.pdf/9442158)
Supplement: MOESM1 [file 9442158]

**Eligible:**

n=1605

- request for participation pediatricians
- informed consent parents

**Included:**

n=628 in original cohort  
n=558 after removal of vaccine serotypes

parental perception questionnaires

**Hearing loss:**

n=43 in original cohort  
n=31 after removal of vaccine serotypes

**No hearing loss:**

n=585 in original cohort  
n=527 after removal of vaccine serotypes
